# Supplementary material for: A Conceptual Framework for Quantifying the Robustness of a Regression-Based Causal Inference in Observational Study
Source: MDPI journal article supplement (doi:10.3390/math12030388), 2024-01-25
Supplement: s1 [file s1]

## Supplementary Material

### 1. Proof of Theorem 1:

Our goal is to derive the formula for least square estimate of regression coefficient for W (i.e.,  $\hat{\beta}_W^{id}$ ) based on the ideal sample and the variance of  $\hat{\beta}_W^{id}$ , for observational studies. First, one needs to define the following ordered data matrices for the ideal sample:

$$\begin{aligned}
 \mathbf{D} &= [\mathbf{Y}_{(n^{un}+n^{ob}) \times 1}, \mathbf{X}_{(n^{un}+n^{ob}) \times (p+2)}] = [\mathbf{Y}_{2n^{ob} \times 1}, \mathbf{X}_{2n^{ob} \times (p+2)}] \\
 \mathbf{X} &= [\mathbf{1}_{(n^{un}+n^{ob}) \times 1}, \mathbf{V}_{(n^{un}+n^{ob}) \times (p+1)}] = [\mathbf{1}_{2n^{ob} \times 1}, \mathbf{V}_{2n^{ob} \times (p+1)}] \\
 \mathbf{V} &= [\mathbf{Z}_{(n^{un}+n^{ob}) \times p}, \mathbf{W}_{(n^{un}+n^{ob}) \times 1}] = \begin{bmatrix} \mathbf{Z}_{n^{ob} \times p}^{ob}, \mathbf{1}_{n^{ob} \times 1} - \mathbf{W}_{n^{ob} \times 1}^{ob} \\ \mathbf{Z}_{n^{ob} \times p}^{ob}, \mathbf{W}_{n^{ob} \times 1}^{ob} \end{bmatrix} \\
 \mathbf{Z} &= [\mathbf{Z}_1, \mathbf{Z}_2, \dots, \mathbf{Z}_p]_{(n^{un}+n^{ob}) \times p} = [\mathbf{Z}_1, \mathbf{Z}_2, \dots, \mathbf{Z}_p]_{2n^{ob} \times p}
 \end{aligned} \tag{S1}$$

and the following ordered mean vectors:

$$\begin{aligned}
 \bar{\mathbf{V}}^{id} &= [\bar{\mathbf{Z}}^{id}, \bar{\mathbf{W}}^{id}]_{1 \times (p+1)} \\
 \bar{\mathbf{Z}}^{id} &= [\bar{\mathbf{Z}}_1^{id}, \bar{\mathbf{Z}}_2^{id}, \dots, \bar{\mathbf{Z}}_p^{id}]_{1 \times p}
 \end{aligned} \tag{S2}$$

The matrix  $\mathbf{X}^T \mathbf{X}$  for the ideal sample could then be modeled as the following block matrix:

$$\mathbf{X}^T \mathbf{X} = \begin{pmatrix} n^{un} + n^{ob} & (n^{un} + n^{ob}) \bar{\mathbf{V}}^{id} \\ (n^{un} + n^{ob}) (\bar{\mathbf{V}}^{id})^T & \mathbf{V}^T \mathbf{V} \end{pmatrix} \tag{S3}$$

The inverse of  $\mathbf{X}^T \mathbf{X}$  can be shown to have the following form:

$$(\mathbf{X}^T \mathbf{X})^{-1} = \begin{pmatrix} \frac{1}{n^{un} + n^{ob}} + \bar{\mathbf{V}}^{id} \frac{1}{n^{un} + n^{ob}} (\mathbf{S}_{VV}^{id})^{-1} (\bar{\mathbf{V}}^{id})^T & -\frac{1}{n^{un} + n^{ob}} \bar{\mathbf{V}}^{id} (\mathbf{S}_{VV}^{id})^{-1} \\ -\frac{1}{n^{un} + n^{ob}} (\mathbf{S}_{VV}^{id})^{-1} (\bar{\mathbf{V}}^{id})^T & \frac{1}{n^{un} + n^{ob}} (\mathbf{S}_{VV}^{id})^{-1} \end{pmatrix} \quad (\text{S4})$$

It should be clear now that, to determine the definite form of  $(\mathbf{X}^T \mathbf{X})^{-1}$  I need to find out what

$(\mathbf{S}_{VV}^{id})^{-1}$  is. As a variance-covariance matrix for the vector of predictors  $\mathbf{V}$ ,  $\mathbf{S}_{VV}^{id}$  can be expressed

as the block matrix whose elements is formalized below:

$$\mathbf{S}_{VV}^{id} = \begin{pmatrix} \mathbf{S}_{ZZ}^{id} & \mathbf{S}_{ZW}^{id} \\ \mathbf{S}_{WZ}^{id} & \hat{\sigma}_{WW}^{id} \end{pmatrix}_{(p+1) \times (p+1)} \quad (\text{S5})$$

where:

$$\begin{aligned} \mathbf{S}_{ZZ}^{id} &= \begin{pmatrix} \hat{\sigma}_{Z_1 Z_1}^{id} & \dots & \sigma_{Z_1 Z_p}^{id} \\ \vdots & \ddots & \vdots \\ \hat{\sigma}_{Z_p Z_1}^{id} & \dots & \sigma_{Z_p Z_p}^{id} \end{pmatrix}_{p \times p} \\ \mathbf{S}_{ZW}^{id} &= \begin{pmatrix} \hat{\sigma}_{Z_1 W}^{id} \\ \vdots \\ \hat{\sigma}_{Z_p W}^{id} \end{pmatrix}_{p \times 1} \\ \mathbf{S}_{WZ}^{id} &= \begin{pmatrix} \hat{\sigma}_{Z_1 W}^{id} & \dots & \sigma_{Z_p W}^{id} \end{pmatrix}_{1 \times p} \end{aligned} \quad (\text{S6})$$

Furthermore, we define the following covariance vector:

$$\mathbf{S}_{ZY}^{id} = \begin{pmatrix} \hat{\sigma}_{Z_1 Y}^{id} \\ \vdots \\ \hat{\sigma}_{Z_p Y}^{id} \end{pmatrix}_{p \times 1} \quad (S7)$$

All aforementioned sample covariances and variances are supposed to be computed according to the following formula:

$$\begin{aligned} \hat{\sigma}_{xy} &= \frac{1}{n} \sum_{i=1}^n (x_i - \bar{x})(y_i - \bar{y}) \\ \hat{\sigma}_{xx} &= \frac{1}{n} \sum_{i=1}^n (x_i - \bar{x})^2 \end{aligned} \quad (S8)$$

for any variable x or y and any sample size n in this context.

Consequently, the inverse of  $\mathbf{S}_{VV}^{id}$  can be formulated here:

$$\begin{aligned} (\mathbf{S}_{VV}^{id})^{-1} &= \\ &\begin{bmatrix} (\mathbf{S}_{ZZ}^{id})^{-1} + (\mathbf{S}_{ZZ}^{id})^{-1} \mathbf{S}_{ZW}^{id} (\hat{\sigma}_{WW}^{id} - \mathbf{S}_{WZ}^{id} (\mathbf{S}_{ZZ}^{id})^{-1} \mathbf{S}_{ZW}^{id})^{-1} \mathbf{S}_{WZ}^{id} (\mathbf{S}_{ZZ}^{id})^{-1} & -(\mathbf{S}_{ZZ}^{id})^{-1} \mathbf{S}_{ZW}^{id} (\hat{\sigma}_{WW}^{id} - \mathbf{S}_{WZ}^{id} (\mathbf{S}_{ZZ}^{id})^{-1} \mathbf{S}_{ZW}^{id})^{-1} \\ -(\hat{\sigma}_{WW}^{id} - \mathbf{S}_{WZ}^{id} (\mathbf{S}_{ZZ}^{id})^{-1} \mathbf{S}_{ZW}^{id})^{-1} \mathbf{S}_{WZ}^{id} (\mathbf{S}_{ZZ}^{id})^{-1} & (\hat{\sigma}_{WW}^{id} - \mathbf{S}_{WZ}^{id} (\mathbf{S}_{ZZ}^{id})^{-1} \mathbf{S}_{ZW}^{id})^{-1} \end{bmatrix} \end{aligned} \quad (S9)$$

Plugging the above matrix of  $(\mathbf{S}_{VV}^{id})^{-1}$  into the block matrix of  $(\mathbf{X}^T \mathbf{X})^{-1}$  will give us the complete definite form of matrix  $(\mathbf{X}^T \mathbf{X})^{-1}$ , whose elements are all ideal sample statistics such as ideal sample variances, ideal sample covariances and ideal sample means. To isolate the estimated regression coefficient for W, I only need to use the elements in the last row of  $(\mathbf{X}^T \mathbf{X})^{-1}$ , which are provide next:

$$\begin{aligned}
(\mathbf{X}^T \mathbf{X})_{(p+2)1}^{-1} &= \frac{1}{n^{un} + n^{ob}} [(\hat{\sigma}_{WW}^{id} - \mathbf{S}_{WZ}^{id} (\mathbf{S}_{ZZ}^{id})^{-1} \mathbf{S}_{ZW}^{id})^{-1} \mathbf{S}_{WZ}^{id} (\mathbf{S}_{ZZ}^{id})^{-1} (\bar{\mathbf{Z}}^{id})^T - \bar{W}^{id} (\hat{\sigma}_{WW}^{id} - \mathbf{S}_{WZ}^{id} (\mathbf{S}_{ZZ}^{id})^{-1} \mathbf{S}_{ZW}^{id})^{-1}] \\
[(\mathbf{X}^T \mathbf{X})_{(p+2)2}^{-1}, \dots, (\mathbf{X}^T \mathbf{X})_{(p+2)(p+1)}^{-1}] &= -\frac{1}{n^{un} + n^{ob}} (\hat{\sigma}_{WW}^{id} - \mathbf{S}_{WZ}^{id} (\mathbf{S}_{ZZ}^{id})^{-1} \mathbf{S}_{ZW}^{id})^{-1} \mathbf{S}_{WZ}^{id} (\mathbf{S}_{ZZ}^{id})^{-1} \\
(\mathbf{X}^T \mathbf{X})_{(p+2)(p+2)}^{-1} &= \frac{1}{n^{un} + n^{ob}} (\hat{\sigma}_{WW}^{id} - \mathbf{S}_{WZ}^{id} (\mathbf{S}_{ZZ}^{id})^{-1} \mathbf{S}_{ZW}^{id})^{-1}
\end{aligned}
\tag{S10}$$

Because the estimated regression coefficient for W is the last element of  $(\mathbf{X}^T \mathbf{X})^{-1} \mathbf{X}^T \mathbf{Y}$  which is the dot product between the last row of  $(\mathbf{X}^T \mathbf{X})^{-1}$  and  $\mathbf{X}^T \mathbf{Y}$ , the expression of  $\mathbf{X}^T \mathbf{Y}$  is also needed here:

$$\mathbf{X}^T \mathbf{Y} = \begin{bmatrix} (n^{un} + n^{ob}) \bar{Y}^{id} \\ \mathbf{Z}^T \mathbf{Y} \\ \mathbf{W}^T \mathbf{Y} \end{bmatrix} \tag{S11}$$

where:

$$\begin{aligned}
\mathbf{Z}^T \mathbf{Y} &= (n^{un} + n^{ob}) \mathbf{S}_{ZY}^{id} + (n^{un} + n^{ob}) \bar{Y}^{id} (\bar{\mathbf{Z}}^{id})^T \\
\mathbf{W}^T \mathbf{Y} &= (n^{un} + n^{ob}) \hat{\sigma}_{WY}^{id} + (n^{un} + n^{ob}) \bar{W}^{id} \bar{Y}^{id}
\end{aligned}
\tag{S12}$$

Now one can calculate the estimated regression coefficient for W as the dot product between the last row of  $(\mathbf{X}^T \mathbf{X})^{-1}$  and the vector  $\mathbf{X}^T \mathbf{Y}$ . The result is presented below:

$$\hat{\beta}_W^{id} = \frac{\hat{\sigma}_{WY}^{id} - \mathbf{S}_{WZ}^{id} (\mathbf{S}_{ZZ}^{id})^{-1} \mathbf{S}_{ZY}^{id}}{\hat{\sigma}_{WW}^{id} - \mathbf{S}_{WZ}^{id} (\mathbf{S}_{ZZ}^{id})^{-1} \mathbf{S}_{ZW}^{id}} \tag{S13}$$

The variance of  $\hat{\beta}_W^{id}$  should be straightforward: it is just the product of the known residual variance  $\sigma^2$  and the element in the  $(p+2)^{th}$  row and the  $(p+2)^{th}$  column of  $(\mathbf{X}^T \mathbf{X})^{-1}$ :

$$Var(\hat{\beta}_W^{id}) = \frac{\sigma^2}{n^{un} + n^{ob}} (\hat{\sigma}_{WW}^{id} - \mathbf{S}_{WZ}^{id} (\mathbf{S}_{ZZ}^{id})^{-1} \mathbf{S}_{ZW}^{id})^{-1} \quad (S14)$$

We note here that  $\mathbf{S}_{WZ}^{id}$  appears in (A13) and (A14) should be equal to  $\mathbf{0}$  as the correlation between the treatment indicator  $W$  and any single covariate in  $\mathbf{Z}$  should be exactly 0, given that each subject in the ideal sample should be thought to participate in both the treatment and control group (which means the conditions  $W = 1$  and  $W = 0$  appear in every subject). As a result, the expressions of (A13) and (A14) can be greatly simplified for the ideal sample, given  $\mathbf{S}_{WZ}^{id} = \mathbf{0}$  and  $n^{un} = n^{ob}$ :

$$\hat{\beta}_W^{id} = r_{wy}^{id} \quad (S15)$$

$$Var(\hat{\beta}_W^{id}) = \frac{1-R^2}{2n^{ob}} \quad (S16)$$

where  $r_{wy}^{id}$  denotes the correlation between the treatment status ( $W$ ) and the outcome ( $Y$ ) in the ideal sample. The expression of  $\hat{\beta}_W^{id}$  can be further derived based on Cohen et al. (2003):

$$\hat{\beta}_W^{id} = \left( \frac{\bar{Y}_t^{id} - \bar{Y}_c^{id}}{\sigma_Y^{id}} \right) 0.5 \quad (S17)$$

The expression for  $\sigma_Y^{id}$  is derived as:

$$\begin{aligned}
\sigma_Y^{id} &= \sqrt{0.5[\frac{\sigma_t^2}{\pi} + \pi(1-\pi)(\bar{Y}_t^{un} - \bar{Y}_t^{ob})^2] + 0.5[\sigma_c^2 + \pi(1-\pi)(\bar{Y}_c^{un} - \bar{Y}_c^{ob})^2] + 0.25(\bar{Y}_t^{id} - \bar{Y}_c^{id})^2} \\
&= \sqrt{0.5\frac{\sigma_t^2}{\pi} + 0.5\pi(1-\pi)[(\bar{Y}_t^{un} - \bar{Y}_t^{ob})^2 + (\bar{Y}_c^{un} - \bar{Y}_c^{ob})^2] + 0.5\sigma_c^2 + 0.25(\bar{Y}_t^{id} - \bar{Y}_c^{id})^2}
\end{aligned}
\tag{S18}$$

Combining (A17) and (A18),  $\hat{\beta}_W^{id}$  is written as follows:

$$\hat{\beta}_W^{id} = \frac{\bar{Y}_t^{id} - \bar{Y}_c^{id}}{\sqrt{2\hat{\sigma}_t^2 + 2\pi(1-\pi)[(\bar{Y}_t^{un} - \bar{Y}_t^{ob})^2 + (\bar{Y}_c^{un} - \bar{Y}_c^{ob})^2] + 2\hat{\sigma}_c^2 + (\bar{Y}_t^{id} - \bar{Y}_c^{id})^2}} \tag{S19}$$

where:

$$\begin{aligned}
\bar{Y}_t^{id} &= (1-\pi)\bar{Y}_t^{un} + \pi\bar{Y}_t^{ob} \\
\bar{Y}_c^{id} &= \pi\bar{Y}_c^{un} + (1-\pi)\bar{Y}_c^{ob}
\end{aligned}
\tag{S20}$$

Given the expression of  $\hat{\beta}_W^{id}$  in (A19) and the expression of  $Var(\hat{\beta}_W^{id})$  in (A16), the probit functions of the PIV can be easily derived based on the definitions (2) and (3) in the main text.

This concludes the proof of theorem 1.

## 2. Supplementary Material Figure S1:

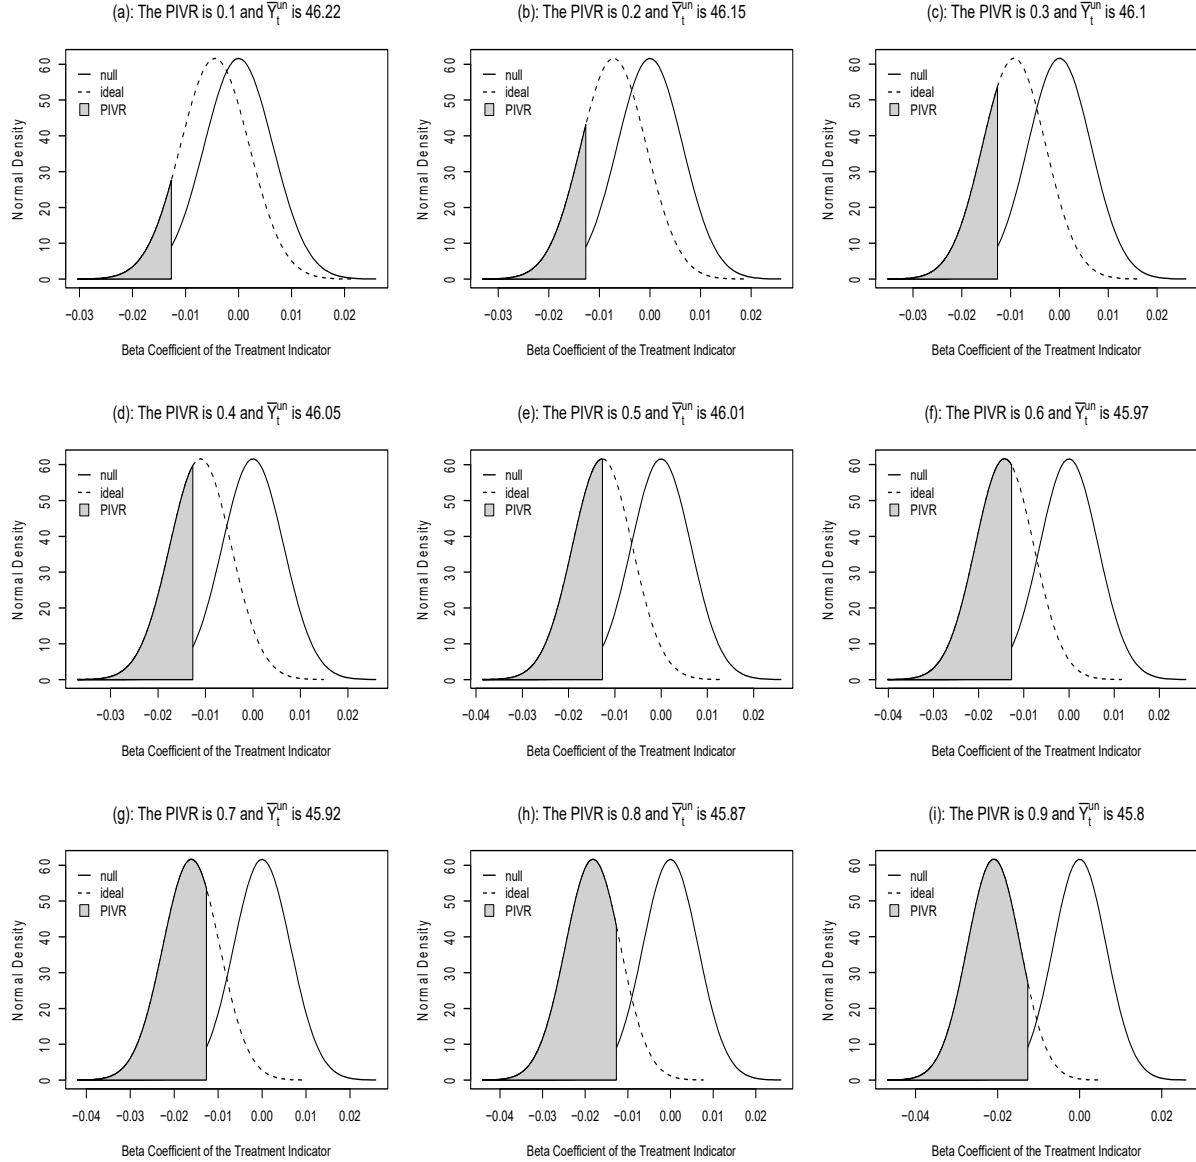

*Supplementary Material Figure S1:* The relationship between the PIVR and retesting the null hypothesis based on the ideal sample for Hong and Raudenbush (2005), assuming  $\bar{Y}_c^{un} = 45.2$ . The solid curve represents the null hypothesis:  $\beta_W = 0$  and the dashed curve represents the alternative hypothesis:  $\beta_W = \hat{\beta}_W^{id}$ . The grey shaded area symbolizes the PIVR of Hong and Raudenbush (2005).
