# Supplementary material for: A Conceptual Framework for Quantifying the Robustness of a Regression-Based Causal Inference in Observational Study
Source: MDPI journal article supplement (doi:10.3390/math12030388), 2024-01-25
Supplement: s1 [file s1]

Archive with 1 entries (1 files):
- mathematics-2584466-supplementary.pdf
